# Supplementary material
Source: bioRxiv or medRxiv preprint supplement (https://www.biorxiv.org/highwire/filestream/13805/field_highwire_adjunct_files/1/050641-2.pdf)

# Supplemental Figure 2 – Waveform Discrimination

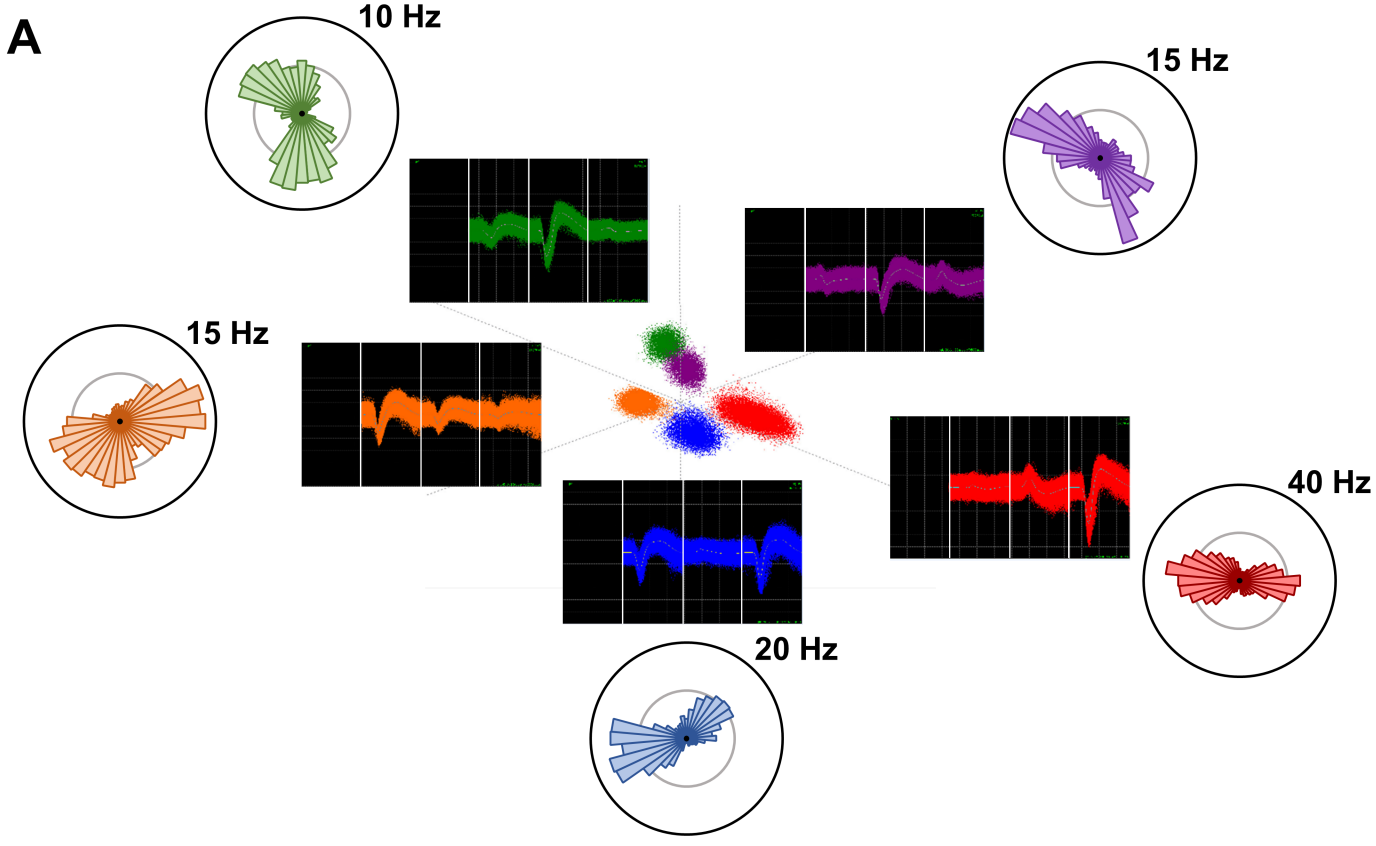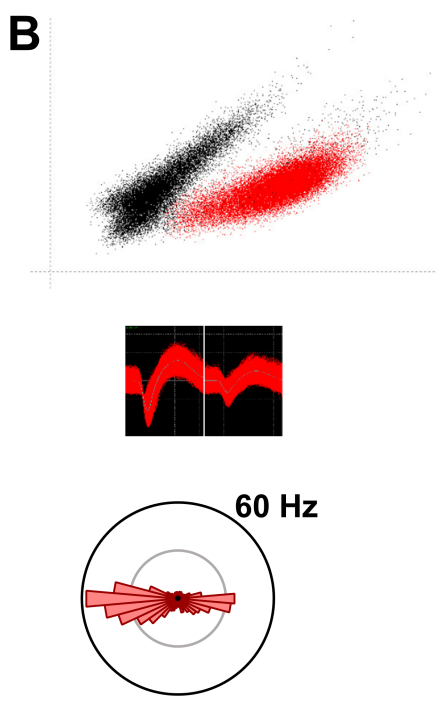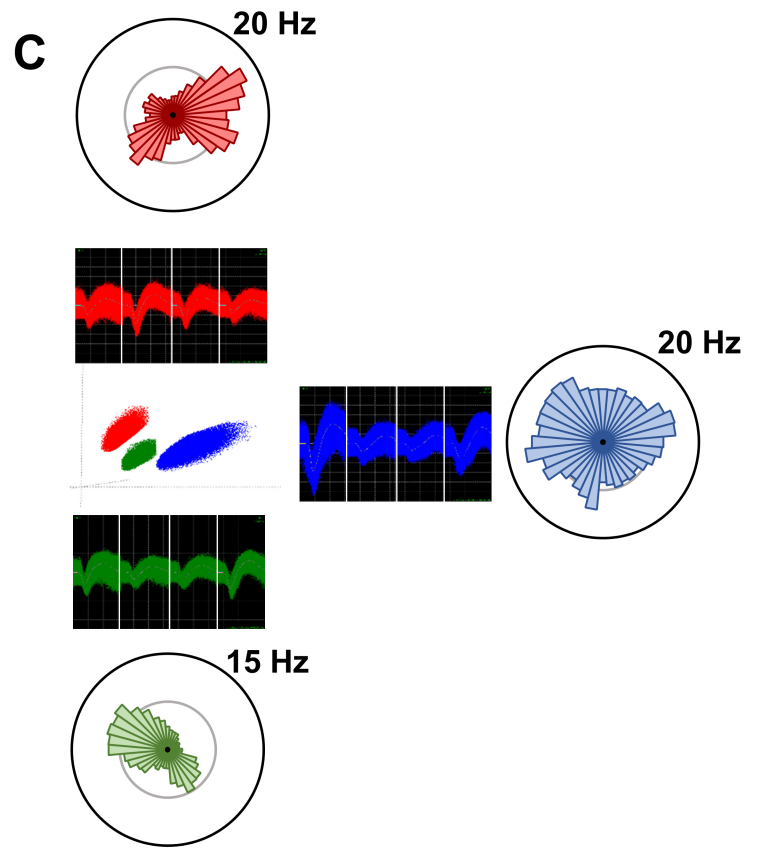

Supplement: Supplementary file [file 050641-2.pdf]
